# Supplementary material for: Effectiveness and experiences of the Extension for Community Healthcare Outcomes (ECHO) Model in developing competencies among healthcare professionals: a mixed methods systematic review protocol
Source: PubMed Central journal article supplement (PMC8675457; doi:10.1186/s13643-021-01832-0), 2021-12-16
Supplement: 13643_2021_1832_MOESM4_ESM.pdf [file 13643_2021_1832_MOESM4_ESM.pdf]

**Additional file 4: Example of a matrix for integrating the QUAN and QUAL findings of the review, inspired from Candy *et al.* (2011) [75]**

**Table 3. Tabulation of critical factors (1 - ...) drawn from the QUAL findings (themes), categorized according to nature of factors [34], with each ECHO program components/characteristics and effect size (E) on healthcare professionals' competency development**

| QUAL component: Themes from the experiences/views of ECHO's participants                |                                |   |   |                            |   |                                 |     |                     |
|-----------------------------------------------------------------------------------------|--------------------------------|---|---|----------------------------|---|---------------------------------|-----|---------------------|
| QUAN component:<br>ECHO programs'<br>components/<br>characteristics with<br>effect size | Educational factors<br>(1 - 3) |   |   | Personal factors<br>(4, 5) |   | Contextual factors<br>(6 - ...) |     | E                   |
|                                                                                         | 1                              | 2 | 3 | 4                          | 5 | 6                               | ... |                     |
| <b>Reference of study A:</b>                                                            |                                |   |   |                            |   |                                 |     |                     |
| - Duration: 9 months                                                                    |                                |   |   |                            |   |                                 |     |                     |
| - Frequency: 2 hours weekly                                                             |                                |   |   |                            |   |                                 |     |                     |
| - Topic: mental health and substance use disorders                                      |                                |   |   |                            |   |                                 |     |                     |
| - Population: primary care providers                                                    | X                              | ∅ | — | X                          | X | ∅                               | ... | Effect size measure |
| - Educators: interdisciplinary panel of experts in co-occurring disorders               |                                |   |   |                            |   |                                 |     |                     |
| ...                                                                                     |                                |   |   |                            |   |                                 |     |                     |
| <b>Reference of study B:</b>                                                            |                                |   |   |                            |   |                                 |     |                     |
| <b>Reference of study C:</b>                                                            |                                |   |   |                            |   |                                 |     |                     |
| <b>Reference of study ...</b>                                                           |                                |   |   |                            |   |                                 |     |                     |

*Note.* ECHO = Extension for Healthcare Community Outcomes; QUAL = Qualitative; QUAN = Quantitative.  
 Legend. E = effect size; X = Commonality (correspondence) between an important factor and an ECHO program components/characteristics; ∅ = ECHO program components/characteristics do not correspond with an important factor; — = Insufficient information in a QUAN study to state whether an important factor was present in an ECHO program or not.
