# Supplementary material for: Effectiveness and experiences of the Extension for Community Healthcare Outcomes (ECHO) Model in developing competencies among healthcare professionals: a mixed methods systematic review protocol
Source: Springer Nature journal article supplement (doi:10.1186/s13643-021-01832-0), 2021-12-01
Supplement: MOESM3 [file 19965138]

### Additional file 3: Complete search strategy for the electronic databases

#### MEDLINE(R) ALL 1946 to October 01, 2020 [OVID]

|           |                                                                                                                                                                                                                                                                                                                                                                                                                                                        |              |
|-----------|--------------------------------------------------------------------------------------------------------------------------------------------------------------------------------------------------------------------------------------------------------------------------------------------------------------------------------------------------------------------------------------------------------------------------------------------------------|--------------|
| 1         | Extension for Community Healthcare Outcomes.tw,sh,kf.                                                                                                                                                                                                                                                                                                                                                                                                  | 113          |
| 2         | ((project* or program* or telementor* or tele-mentor* or model* or videoconferen*) adj5 (ECHO or ECHO's or virtual consultation*)).tw,sh,kf.                                                                                                                                                                                                                                                                                                           | 745          |
| 3         | (SCAN-ECHO or tele-ECHO).tw,sh,kf.                                                                                                                                                                                                                                                                                                                                                                                                                     | 43           |
| 4         | ((project* or mentor* or telementor* or tele-mentor* or videoconferen*) adj5 ECHO*).tw,sh,kf.                                                                                                                                                                                                                                                                                                                                                          | 411          |
| 5         | (legitimate peripheral participation* or "hub-and-spoke").tw,sh,kf.                                                                                                                                                                                                                                                                                                                                                                                    | 435          |
| 6         | ((communit* or "situated learning" or network* or knowledge or VCoPs) adj5 (ECHO or ECHO's)).tw,sh,kf.                                                                                                                                                                                                                                                                                                                                                 | 371          |
| <b>7</b>  | <b>or/1-6</b>                                                                                                                                                                                                                                                                                                                                                                                                                                          | <b>1620</b>  |
| 8         | (virtual communit* of practice or "VCoPs" or "knowledge network" or "situated learning" or "virtual community of practice" or knowledge communit* or "virtual collaboration" or network* of practice or virtual knowledge-sharing communit* or virtual communit* of learning or virtual collaborative communit* or online learning communit* or virtual learning communit*).tw,sh,kf.                                                                  | 724          |
| 9         | ((virtual or online or distance or web or internet or remote or Facebook or social network* or Twitter or Instagram or Linkedin or doximity or technolog*) adj2 (practic* or learning or collaboration or knowledge or mentorship or educat*) adj2 (communit* or network* or group or Forum* or blog* or exchang*)).tw,sh,kf.                                                                                                                          | 836          |
| <b>10</b> | <b>8 or 9</b>                                                                                                                                                                                                                                                                                                                                                                                                                                          | <b>1504</b>  |
| 11        | (tele-mentor* or telementor* or telemedicine or telehealth).tw,kf.                                                                                                                                                                                                                                                                                                                                                                                     | 18406        |
| 12        | Education, Continuing/ or Online Systems/ or telemedicine/                                                                                                                                                                                                                                                                                                                                                                                             | 41154        |
| 13        | exp Videoconferencing/                                                                                                                                                                                                                                                                                                                                                                                                                                 | 1954         |
| 14        | (videoconferenc* or video-conferenc* or tele-educat* or tele-conferenc* or teleconferenc* or teletrain* or tele-train* or teleconsult* or tele-consult* or teletrain* or online learn* or online mentor* or virtual consult* or virtual communit* of practice or VCoPs or virtual community of learning or virtual collaboration* or knowledge network* or distance learn* or collaborative learn* or distance education* or online technolog*).tw,kf. | 10706        |
| 15        | Education, Medical, Continuing/ or Education, Distance/                                                                                                                                                                                                                                                                                                                                                                                                | 28686        |
| 16        | Remote Consultation/ or Distance Counseling/                                                                                                                                                                                                                                                                                                                                                                                                           | 4909         |
| 17        | Computer-Assisted Instruction/                                                                                                                                                                                                                                                                                                                                                                                                                         | 11900        |
| <b>18</b> | <b>or/11-17</b>                                                                                                                                                                                                                                                                                                                                                                                                                                        | <b>95668</b> |
| 19        | Tertiary Care Centers/                                                                                                                                                                                                                                                                                                                                                                                                                                 | 14126        |
| 20        | Academic Medical Centers/                                                                                                                                                                                                                                                                                                                                                                                                                              | 18967        |
| 21        | Hospitals, University/                                                                                                                                                                                                                                                                                                                                                                                                                                 | 30014        |

|           |                                                                                                                                   |               |
|-----------|-----------------------------------------------------------------------------------------------------------------------------------|---------------|
| 22        | Hospitals, Urban/                                                                                                                 | 7407          |
| 23        | Specialization/ or specialism/                                                                                                    | 24414         |
| 24        | (speciali* or academic medical cent* or university hospital* or tertiary care cent* or specialty or academic health cent*).ti,kw. | 55102         |
| <b>25</b> | <b>or/19-24</b>                                                                                                                   | <b>130644</b> |
| 26        | Physicians/ or Physicians, Primary Care/ or Physicians, Family/                                                                   | 109206        |
| 27        | General Practitioners/                                                                                                            | 8009          |
| 28        | Nurses/                                                                                                                           | 39274         |
| 29        | Nurse Practitioners/ or Family Nurse Practitioners/                                                                               | 17740         |
| 30        | (physician* or nurse* or nursing).ti,kw.                                                                                          | 374609        |
| 31        | (general practitioner* or generalist*).ti,kw.                                                                                     | 16724         |
| 32        | Rural Health/ or Hospitals, Rural/ or Rural Health Services/                                                                      | 39904         |
| 33        | Primary Health Care/                                                                                                              | 78241         |
| 34        | Medically Underserved Area/                                                                                                       | 7036          |
| 35        | Community Health Services/                                                                                                        | 31756         |
| 36        | Rural Nursing/                                                                                                                    | 109           |
| 37        | (rural adj2 health).tw,sh.                                                                                                        | 7190          |
| 38        | (rural adj2 hospital*).tw,sh.                                                                                                     | 5732          |
| 39        | (medically underserved area* or remote area*).tw,sh.                                                                              | 11955         |
| 40        | rural nurs*.tw,sh.                                                                                                                | 628           |
| <b>41</b> | <b>or/26-40</b>                                                                                                                   | <b>616388</b> |
| <b>42</b> | <b>18 and 25 and 41</b>                                                                                                           | <b>764</b>    |
| <b>43</b> | <b>7 or 10 or 42</b>                                                                                                              | <b>3850</b>   |
| <b>44</b> | <b>limit 43 to yr="2003 -Current"</b>                                                                                             | <b>3040</b>   |

#### Embase 1980 to 2020 Week 40 [OVID]

|   |                                                                                                                                           |      |
|---|-------------------------------------------------------------------------------------------------------------------------------------------|------|
| 1 | Extension for Community Healthcare Outcomes.tw,kw.                                                                                        | 192  |
| 2 | ((project* or program* or telementor* or tele-mentor* or model* or videoconferen*) adj2 (ECHO or ECHO's or virtual consultation*)).tw,kw. | 574  |
| 3 | (SCAN-ECHO or tele-ECHO).tw,kw.                                                                                                           | 67   |
| 4 | ((project* or mentor* or telementor* or tele-mentor* or videoconferen*) adj2 ECHO*).tw,kw.                                                | 375  |
| 5 | (legitimate peripheral participation* or "hub-and-spoke").ti,kw.                                                                          | 187  |
| 6 | ((communit* or "situated learning" or network* or knowledge or VCoPs) adj2 (ECHO or ECHO's)).tw,kw.                                       | 252  |
| 7 | or/1-6                                                                                                                                    | 1142 |

|    |                                                                                                                                                                                                                                                                                                                                                                                                                                                        |        |
|----|--------------------------------------------------------------------------------------------------------------------------------------------------------------------------------------------------------------------------------------------------------------------------------------------------------------------------------------------------------------------------------------------------------------------------------------------------------|--------|
| 8  | (virtual communit* of practice or "VCoPs" or "knowledge network" or "situated learning" or "virtual community of practice" or knowledge communit* or "virtual collaboration" or network* of practice or virtual knowledge-sharing communit* or virtual communit* of learning or virtual collaborative communit* or online learning communit* or virtual learning communit*).tw,kw.                                                                     | 956    |
| 9  | ((virtual or online or distance or web or internet or remote or Facebook or social network* or Twitter or Instagram or Linkedin or doximity or technolog*) adj2 (practic* or learning or collaboration or knowledge or mentorship or educat*) adj2 (communit* or network* or group or Forum* or blog* or exchang*)).tw,kw.                                                                                                                             | 744    |
| 10 | 8 or 9                                                                                                                                                                                                                                                                                                                                                                                                                                                 | 1630   |
| 11 | (tele-mentor* or telementor* or telemedicine or telehealth).tw,kw.                                                                                                                                                                                                                                                                                                                                                                                     | 24048  |
| 12 | continuing education/ or online system/ or telemedicine/                                                                                                                                                                                                                                                                                                                                                                                               | 81969  |
| 13 | videoconferencing/                                                                                                                                                                                                                                                                                                                                                                                                                                     | 4386   |
| 14 | (videoconferenc* or video-conferenc* or tele-educat* or tele-conferenc* or teleconferenc* or teletrain* or tele-train* or teleconsult* or tele-consult* or teletrain* or online learn* or online mentor* or virtual consult* or virtual communit* of practice or VCoPs or virtual community of learning or virtual collaboration* or knowledge network* or distance learn* or collaborative learn* or distance education* or online technolog*).tw,kw. | 14472  |
| 15 | teleconsultation/                                                                                                                                                                                                                                                                                                                                                                                                                                      | 10095  |
| 16 | e-counseling/                                                                                                                                                                                                                                                                                                                                                                                                                                          | 233    |
| 17 | or/11-16                                                                                                                                                                                                                                                                                                                                                                                                                                               | 108975 |
| 18 | tertiary care center/                                                                                                                                                                                                                                                                                                                                                                                                                                  | 62054  |
| 19 | university hospital/                                                                                                                                                                                                                                                                                                                                                                                                                                   | 125395 |
| 20 | urban hospital/                                                                                                                                                                                                                                                                                                                                                                                                                                        | 500    |
| 21 | specialization/                                                                                                                                                                                                                                                                                                                                                                                                                                        | 6902   |
| 22 | (speciali* or academic medical cent* or university hospital* or tertiary care cent* or specialty or academic health cent*).ti,kw.                                                                                                                                                                                                                                                                                                                      | 71992  |
| 23 | or/18-22                                                                                                                                                                                                                                                                                                                                                                                                                                               | 242535 |
| 24 | physician/                                                                                                                                                                                                                                                                                                                                                                                                                                             | 281764 |
| 25 | general practitioner/                                                                                                                                                                                                                                                                                                                                                                                                                                  | 97132  |
| 26 | nurse/                                                                                                                                                                                                                                                                                                                                                                                                                                                 | 122085 |
| 27 | nurse practitioner/                                                                                                                                                                                                                                                                                                                                                                                                                                    | 23470  |
| 28 | family nurse practitioner/                                                                                                                                                                                                                                                                                                                                                                                                                             | 134    |
| 29 | (physician* or nurse* or nursing).ti,kw.                                                                                                                                                                                                                                                                                                                                                                                                               | 352371 |
| 30 | (general practitioner* or generalist*).ti,kw.                                                                                                                                                                                                                                                                                                                                                                                                          | 18189  |
| 31 | Rural Health/ or Hospitals, Rural/ or Rural Health Services/                                                                                                                                                                                                                                                                                                                                                                                           | 13565  |

|    |                                                   |        |
|----|---------------------------------------------------|--------|
| 32 | primary health care/                              | 64655  |
| 33 | community care/                                   | 52458  |
| 34 | rural health nursing/                             | 163    |
| 35 | (rural adj2 health).tw.                           | 7846   |
| 36 | (rural adj2 hospital*).tw.                        | 7111   |
| 37 | (medically underserved area* or remote area*).tw. | 6860   |
| 38 | rural nurs*.tw.                                   | 551    |
| 39 | or/24-38                                          | 862441 |
| 40 | 17 and 23 and 39                                  | 864    |
| 41 | 7 or 10 or 40                                     | 3582   |

**All EBM Reviews - Cochrane DSR, ACP Journal Club, DARE, CCA, CCTR, CMR, HTA, and NHSEED [OVID]**

|    |                                                                                                                                                                                                                                                                                                                                                                                 |      |
|----|---------------------------------------------------------------------------------------------------------------------------------------------------------------------------------------------------------------------------------------------------------------------------------------------------------------------------------------------------------------------------------|------|
| 1  | Extension for Community Healthcare Outcomes.af.                                                                                                                                                                                                                                                                                                                                 | 6    |
| 2  | ((project* or program* or telementor* or tele-mentor* or model* or videoconferen*) adj2 (ECHO or ECHO's or virtual consultation*)).af.                                                                                                                                                                                                                                          | 31   |
| 3  | (SCAN-ECHO or tele-ECHO).af.                                                                                                                                                                                                                                                                                                                                                    | 8    |
| 4  | ((project* or mentor* or telementor* or tele-mentor* or videoconferen*) adj2 ECHO*).af.                                                                                                                                                                                                                                                                                         | 18   |
| 5  | (legitimate peripheral participation* or "hub-and-spoke").ti,kw.                                                                                                                                                                                                                                                                                                                | 9    |
| 6  | ((communit* or "situated learning" or network* or knowledge or VCoPs) adj2 (ECHO or ECHO's)).af.                                                                                                                                                                                                                                                                                | 9    |
| 7  | or/1-6                                                                                                                                                                                                                                                                                                                                                                          | 62   |
| 8  | (virtual communit* of practice or "VCoPs" or "knowledge network" or "situated learning" or "virtual community of practice" or knowledge communit* or "virtual collaboration" or network* of practice or virtual knowledge-sharing communit* or virtual communit* of learning or virtual collaborative communit* or online learning communit* or virtual learning communit*).af. | 89   |
| 9  | ((virtual or online or distance or web or internet or remote or Facebook or social network* or Twitter or Instagram or Linkedin or doximity or technolog*) adj2 (practic* or learning or collaboration or knowledge or mentorship or educat*) adj2 (communit* or network* or group or Forum* or blog* or exchang*)).af.                                                         | 228  |
| 10 | 8 or 9                                                                                                                                                                                                                                                                                                                                                                          | 309  |
| 11 | (tele-mentor* or telementor* or telemedicine or telehealth).af.                                                                                                                                                                                                                                                                                                                 | 5763 |
| 12 | continuing education/ or online system/ or telemedicine/                                                                                                                                                                                                                                                                                                                        | 2557 |
| 13 | videoconferencing/                                                                                                                                                                                                                                                                                                                                                              | 190  |

|    |                                                                                                                                                                                                                                                                                                                                                                                                                                                     |       |
|----|-----------------------------------------------------------------------------------------------------------------------------------------------------------------------------------------------------------------------------------------------------------------------------------------------------------------------------------------------------------------------------------------------------------------------------------------------------|-------|
| 14 | (videoconferenc* or video-conferenc* or tele-educat* or tele-conferenc* or teleconferenc* or teletrain* or tele-train* or teleconsult* or tele-consult* or teletrain* or online learn* or online mentor* or virtual consult* or virtual communit* of practice or VCoPs or virtual community of learning or virtual collaboration* or knowledge network* or distance learn* or collaborative learn* or distance education* or online technolog*).af. | 2559  |
| 15 | teleconsultation/                                                                                                                                                                                                                                                                                                                                                                                                                                   | 441   |
| 16 | e-counseling/                                                                                                                                                                                                                                                                                                                                                                                                                                       | 0     |
| 17 | or/11-16                                                                                                                                                                                                                                                                                                                                                                                                                                            | 8135  |
| 18 | tertiary care center/                                                                                                                                                                                                                                                                                                                                                                                                                               | 2     |
| 19 | university hospital/                                                                                                                                                                                                                                                                                                                                                                                                                                | 1007  |
| 20 | urban hospital/                                                                                                                                                                                                                                                                                                                                                                                                                                     | 187   |
| 21 | specialization/                                                                                                                                                                                                                                                                                                                                                                                                                                     | 113   |
| 22 | (speciali* or academic medical cent* or university hospital* or tertiary care cent* or specialty or academic health cent*).ti,kw.                                                                                                                                                                                                                                                                                                                   | 10027 |
| 23 | or/18-22                                                                                                                                                                                                                                                                                                                                                                                                                                            | 11167 |
| 24 | physician/                                                                                                                                                                                                                                                                                                                                                                                                                                          | 896   |
| 25 | general practitioner/                                                                                                                                                                                                                                                                                                                                                                                                                               | 31    |
| 26 | nurse/                                                                                                                                                                                                                                                                                                                                                                                                                                              | 1     |
| 27 | nurse practitioner/                                                                                                                                                                                                                                                                                                                                                                                                                                 | 337   |
| 28 | family nurse practitioner/                                                                                                                                                                                                                                                                                                                                                                                                                          | 2     |
| 29 | (physician* or nurse* or nursing).ti,kw.                                                                                                                                                                                                                                                                                                                                                                                                            | 32194 |
| 30 | (general practitioner* or generalist*).ti,kw.                                                                                                                                                                                                                                                                                                                                                                                                       | 3405  |
| 31 | Rural Health/ or Hospitals, Rural/ or Rural Health Services/                                                                                                                                                                                                                                                                                                                                                                                        | 963   |
| 32 | primary health care/                                                                                                                                                                                                                                                                                                                                                                                                                                | 4661  |
| 33 | community care/                                                                                                                                                                                                                                                                                                                                                                                                                                     | 14    |
| 34 | rural health nursing/                                                                                                                                                                                                                                                                                                                                                                                                                               | 0     |
| 35 | (rural adj2 health).af.                                                                                                                                                                                                                                                                                                                                                                                                                             | 1855  |
| 36 | (rural adj2 hospital*).af.                                                                                                                                                                                                                                                                                                                                                                                                                          | 423   |
| 37 | (medically underserved area* or remote area*).af.                                                                                                                                                                                                                                                                                                                                                                                                   | 518   |
| 38 | rural nurs*.tw.                                                                                                                                                                                                                                                                                                                                                                                                                                     | 10    |
| 39 | or/25-38                                                                                                                                                                                                                                                                                                                                                                                                                                            | 41820 |
| 40 | 17 and 24 and 40                                                                                                                                                                                                                                                                                                                                                                                                                                    | 87    |
| 41 | 7 or 10 or 40                                                                                                                                                                                                                                                                                                                                                                                                                                       | 453   |

### CINAHL COMPLETE [EBSCO]

| # | Question | Résultats |
|---|----------|-----------|
|---|----------|-----------|

|     |                                                                                                                                                                                                                                                                                                                                                                                                                                                                                                                                                                                                                                                                                                                                                                                                                                                                                                                                                                                                                                                              |         |
|-----|--------------------------------------------------------------------------------------------------------------------------------------------------------------------------------------------------------------------------------------------------------------------------------------------------------------------------------------------------------------------------------------------------------------------------------------------------------------------------------------------------------------------------------------------------------------------------------------------------------------------------------------------------------------------------------------------------------------------------------------------------------------------------------------------------------------------------------------------------------------------------------------------------------------------------------------------------------------------------------------------------------------------------------------------------------------|---------|
| S1  | TI Extension for Community Healthcare Outcomes OR TI ( ((project* or program* or telementor* or tele-mentor* or model* or videoconferen*) N2 (ECHO or ECHO's or virtual consultation*)) ) OR TI ( (SCAN-ECHO or tele-ECHO) ) OR TI ( ((project* or mentor* or telementor* or tele-mentor* or videoconferen*) N1 ECHO*) ) OR TI ( (legitimate peripheral participation* or "hub-and-spoke") ) OR TI ( ((communit* or "situated learning" or network* or knowledge or VCoPs) N2 (ECHO or ECHO's)) )                                                                                                                                                                                                                                                                                                                                                                                                                                                                                                                                                            | 174     |
| S2  | AB Extension for Community Healthcare Outcomes OR AB ( ((project* or program* or telementor* or tele-mentor* or model* or videoconferen*) N2 (ECHO or ECHO's or virtual consultation*)) ) OR AB ( (SCAN-ECHO or tele-ECHO) ) OR AB ( ((project* or mentor* or telementor* or tele-mentor* or videoconferen*) N1 ECHO*) ) OR AB ( (legitimate peripheral participation* or "hub-and-spoke") ) OR AB ( ((communit* or "situated learning" or network* or knowledge or VCoPs) N2 (ECHO or ECHO's)) )                                                                                                                                                                                                                                                                                                                                                                                                                                                                                                                                                            | 351     |
| S3  | TI ( virtual communit* of practice or "VCoPs" or "knowledge network" or "situated learning" or "virtual community of practice" or knowledge communit* or "virtual collaboration" or network* of practice or virtual knowledge-sharing communit* or virtual communit* of learning or virtual collaborative communit* or online learning communit* or virtual learning communit*) ) OR AB ( virtual communit* of practice or "VCoPs" or "knowledge network" or "situated learning" or "virtual community of practice" or knowledge communit* or "virtual collaboration" or network* of practice or virtual knowledge-sharing communit* or virtual communit* of learning or virtual collaborative communit* or online learning communit* or virtual learning communit*) )                                                                                                                                                                                                                                                                                       | 522     |
| S4  | TI ( ((virtual or online or distance or web or internet or remote or Facebook or social network* or Twitter or Instagram or Linkedin or doximity or technolog*) N2 (practic* or learning or collaboration or knowledge or mentorship or educat*) N2 (communit* or network* or group or Forum* or blog* or exchang*)) ) OR AB ( ((virtual or online or distance or web or internet or remote or Facebook or social network* or Twitter or Instagram or Linkedin or doximity or technolog*) N2 (practic* or learning or collaboration or knowledge or mentorship or educat*) N2 (communit* or network* or group or Forum* or blog* or exchang*)) )                                                                                                                                                                                                                                                                                                                                                                                                             | 953     |
| S5  | S1 OR S2                                                                                                                                                                                                                                                                                                                                                                                                                                                                                                                                                                                                                                                                                                                                                                                                                                                                                                                                                                                                                                                     | 431     |
| S6  | S3 OR S4                                                                                                                                                                                                                                                                                                                                                                                                                                                                                                                                                                                                                                                                                                                                                                                                                                                                                                                                                                                                                                                     | 1,356   |
| S7  | TI ( (tele-mentor* or telementor* or telemedicine or telehealth) ) OR AB ( (tele-mentor* or telementor* or telemedicine or telehealth) ) OR TI ( (videoconferenc* or video-conferenc* or tele-educat* or tele-conferenc* or teleconferenc* or teletrain* or tele-train* or teleconsult* or tele-consult* or teletrain* or online learn* or online mentor* or virtual consult* or virtual communit* of practice or VCoPs or virtual community of learning or virtual collaboration* or knowledge network* or distance learn* or collaborative learn* or distance education* or online technolog*) ) OR AB ( (videoconferenc* or video-conferenc* or tele-educat* or tele-conferenc* or teleconferenc* or teletrain* or tele-train* or teleconsult* or tele-consult* or teletrain* or online learn* or online mentor* or virtual consult* or virtual communit* of practice or VCoPs or virtual community of learning or virtual collaboration* or knowledge network* or distance learn* or collaborative learn* or distance education* or online technolog*) ) | 15,590  |
| S8  | (MH "Education, Continuing") OR (MH "Education, Medical, Continuing") OR (MH "Online Systems") OR (MH "Telemedicine") OR (MH "Videoconferencing") OR (MH "Telenursing") OR (MH "Telehealth") OR (MH "Remote Consultation")                                                                                                                                                                                                                                                                                                                                                                                                                                                                                                                                                                                                                                                                                                                                                                                                                                   | 47,107  |
| S9  | S7 OR S8                                                                                                                                                                                                                                                                                                                                                                                                                                                                                                                                                                                                                                                                                                                                                                                                                                                                                                                                                                                                                                                     | 54,421  |
| S10 | ( (MH "Tertiary Health Care") OR (MH "Academic Medical Centers") OR (MH "Specialization") ) OR TI ( (speciali* or academic medical cent* or university hospital* or tertiary care cent* or specialty or academic health cent*) ) OR AB ( (speciali* or academic medical cent* or university hospital* or tertiary care cent* or specialty or academic health cent*) )                                                                                                                                                                                                                                                                                                                                                                                                                                                                                                                                                                                                                                                                                        | 200,326 |
| S11 | (MM "Physicians") OR (MH "Physicians, Family") OR (MH "Nurses") OR (MH "Nurse Practitioners") OR (MH "Family Nurse Practitioners") OR (MH "Rural Health") OR (MH "Rural Health Services") OR (MH "Primary Health Care") OR (MH "Hospitals, Rural") OR (MH "Rural Health Centers") OR (MH "Rural Health Nursing")                                                                                                                                                                                                                                                                                                                                                                                                                                                                                                                                                                                                                                                                                                                                             | 208,039 |

|     |                                                                                                                                                                                                                                                                                                                                   |         |
|-----|-----------------------------------------------------------------------------------------------------------------------------------------------------------------------------------------------------------------------------------------------------------------------------------------------------------------------------------|---------|
| S12 | TI ( (physician* or nurse* or nursing) ) OR TI ( (general practitioner* or generalist*) ) OR TI ( (rural) N2 (health or hospital) ) OR AB ( (rural) N2 (health or hospital) ) OR TI ( (medically underserved area* or remote area*) ) OR AB ( (medically underserved area* or remote area*) ) OR TI rural nurs* OR AB rural nurs* | 413,241 |
| S13 | S11 OR S12                                                                                                                                                                                                                                                                                                                        | 553,817 |
| S14 | S9 AND S10 AND S13                                                                                                                                                                                                                                                                                                                | 1,085   |
| S15 | S5 OR S6 OR S14                                                                                                                                                                                                                                                                                                                   | 2,811   |
| S16 | Date de publication: 20030101-20211231                                                                                                                                                                                                                                                                                            | 2,581   |

### APA PsycInfo 1987 to October Week 3 2020 [OVID]

| #  | Searches                                                                                                                                                                                                                                                                                                                                                                                                                                            | Results |
|----|-----------------------------------------------------------------------------------------------------------------------------------------------------------------------------------------------------------------------------------------------------------------------------------------------------------------------------------------------------------------------------------------------------------------------------------------------------|---------|
| 1  | Extension for Community Healthcare Outcomes.tw.                                                                                                                                                                                                                                                                                                                                                                                                     | 14      |
| 2  | (SCAN-ECHO or tele-ECHO).tw.                                                                                                                                                                                                                                                                                                                                                                                                                        | 6       |
| 3  | ((project* or program* or telementor* or tele-mentor* or model* or videoconferen*) adj5 (ECHO or ECHO's or virtual consultation*)).tw.                                                                                                                                                                                                                                                                                                              | 120     |
| 4  | ((project* or mentor* or telementor* or tele-mentor* or videoconferen*) adj5 ECHO*).tw.                                                                                                                                                                                                                                                                                                                                                             | 47      |
| 5  | (legitimate peripheral participation* or "hub-and-spoke").tw.                                                                                                                                                                                                                                                                                                                                                                                       | 238     |
| 6  | ((communit* or "situated learning" or network* or knowledge or VCoPs) adj5 (ECHO or ECHO's)).tw.                                                                                                                                                                                                                                                                                                                                                    | 144     |
| 7  | or/1-6                                                                                                                                                                                                                                                                                                                                                                                                                                              | 479     |
| 8  | (virtual communit* of practice or "VCoPs" or "knowledge network" or "situated learning" or "virtual community of practice" or knowledge communit* or "virtual collaboration" or network* of practice or virtual knowledge-sharing communit* or virtual communit* of learning or virtual collaborative communit* or online learning communit* or virtual learning communit*).ti.                                                                     | 388     |
| 9  | ((virtual or online or distance or web or internet or remote or Facebook or social network* or Twitter or Instagram or LinkedIn or doximity or technolog*) adj2 (practic* or learning or collaboration or knowledge or mentorship or educat*) adj2 (communit* or network* or group or Forum* or blog* or exchang*)).ti.                                                                                                                             | 365     |
| 10 | *Online Community/                                                                                                                                                                                                                                                                                                                                                                                                                                  | 733     |
| 11 | 8 or 9 or 10                                                                                                                                                                                                                                                                                                                                                                                                                                        | 1338    |
| 12 | (tele-mentor* or telementor* or telemedicine or telehealth).tw.                                                                                                                                                                                                                                                                                                                                                                                     | 3612    |
| 13 | (videoconferenc* or video-conferenc* or tele-educat* or tele-conferenc* or teleconferenc* or teletrain* or tele-train* or teleconsult* or tele-consult* or teletrain* or online learn* or online mentor* or virtual consult* or virtual communit* of practice or VCoPs or virtual community of learning or virtual collaboration* or knowledge network* or distance learn* or collaborative learn* or distance education* or online technolog*).tw. | 13922   |
| 14 | Continuing Education/                                                                                                                                                                                                                                                                                                                                                                                                                               | 1545    |

|    |                                                                                                                                   |       |
|----|-----------------------------------------------------------------------------------------------------------------------------------|-------|
| 15 | Telemedicine/                                                                                                                     | 5398  |
| 16 | exp Videoconferencing/                                                                                                            | 599   |
| 17 | Distance Education/                                                                                                               | 5497  |
| 18 | Computer Assisted Instruction/                                                                                                    | 15055 |
| 19 | or/12-18                                                                                                                          | 34539 |
| 20 | (speciali* or academic medical cent* or university hospital* or tertiary care cent* or specialty or academic health cent*).ti,sh. | 6861  |
| 21 | Physicians/ or Family Physicians/                                                                                                 | 20164 |
| 22 | General Practitioners/                                                                                                            | 5644  |
| 23 | Nurses/                                                                                                                           | 25020 |
| 24 | (physician* or nurse* or nursing).ti.                                                                                             | 46413 |
| 25 | (general practitioner* or generalist*).ti.                                                                                        | 1798  |
| 26 | Rural Health/                                                                                                                     | 595   |
| 27 | Primary Health Care/                                                                                                              | 18480 |
| 28 | (rural adj2 health).ti.                                                                                                           | 493   |
| 29 | (rural adj2 hospital*).ti.                                                                                                        | 146   |
| 30 | (medically underserved area* or remote area*).ti.                                                                                 | 84    |
| 31 | rural nurs*.ti.                                                                                                                   | 94    |
| 32 | or/21-31                                                                                                                          | 85497 |
| 33 | 19 and 20 and 32                                                                                                                  | 29    |
| 34 | 7 or 11 or 33                                                                                                                     | 1840  |
| 35 | limit 34 to yr="2003 -Current"                                                                                                    | 1750  |
